# Supplementary material for: Critical Appraisal of Clinical Practice Guidelines for the Care of Patients with Multiple Sclerosis
Source: Research Square preprint supplement (doi:10.21203/rs.3.rs-8317543/v1), 2026-01-16
Supplement: Supplementary file 1 [file 55bb9b6b726fe97f00b6a3da.docx]

**Table 4. Standardized AGREE II Scores for the Evaluation of Clinical Practice Guidelines on the Care of Patients with Multiple Sclerosis**

1. **Multiple sclerosis in adults: management**

| **Total score** | **Appraisers** | | | | | | | | | | | | | | | domains | | | | | | | | |
| --- | --- | --- | --- | --- | --- | --- | --- | --- | --- | --- | --- | --- | --- | --- | --- | --- | --- | --- | --- | --- | --- | --- | --- | --- |
| **10** | **9** | **8** | **7** | **6** | **5** | **4** | | **3** | | **2** | | | | **1** | | | | |  | | | | | | | | | |
| 63 | 6 | 6 | 7 | 6 | 6 | 7 | 6 | | 6 | | 7 | | | | 6 | | | | | Item 1 | | Scope and Purpose | | | | | | |
| 55 | 6 | 5 | 5 | 6 | 5 | 6 | 6 | | 5 | | 6 | | | | 5 | | | | | Item 2 | |
| 66 | 7 | 6 | 7 | 6 | 7 | 6 | 7 | | 7 | | 6 | | | | 7 | | | | | Item 3 | |
| 184 | 19 | 17 | 19 | 18 | 18 | 19 | 19 | | 18 | | 19 | | | | 18 | | | | | Total score | |
| 210 | | | | | | | | | | | | | | | | Maximum score | | | | |  | | | |
| 30 | | | | | | | | | | | | | | | | Minimum score | | | | |
| 85/55% | | | | | | | | | | | | | | | | Standard score | | | | |
| 52 | 5 | 5 | 5 | 5 | 5 | 6 | 6 | 5 | | | | 5 | | 5 | | | Item 4 | | | | | Stakeholder Involvement | | | | | |
| 56 | 6 | 5 | 6 | 5 | 6 | 6 | 5 | 5 | | | | 6 | | 6 | | | Item 5 | | | | |
| 67 | 6 | 7 | 7 | 7 | 7 | 6 | 7 | 7 | | | | 7 | | 6 | | | Item 6 | | | | |
| 175 | 17 | 17 | 21 | 17 | 18 | 18 | 18 | 17 | | | | 18 | | 17 | | | Total score | | | | |
| 210 | | | | | | | | | | | | | | | | Maximum score | | | | |  | | | |
| 30 | | | | | | | | | | | | | | | | Minimum score | | | | |
| 80/55% | | | | | | | | | | | | | | | | Standard score | | | | |
| 17 | 2 | 2 | 2 | 2 | 2 | 1 | 2 | 1 | | | | | 1 | 2 | | | | Item 7 | | | | Rigor of Development | | | | |
| 64 | 6 | 6 | 6 | 7 | 7 | 6 | 6 | 7 | | | | | 7 | 6 | | | | Item 8 | | | |
| 64 | 6 | 6 | 7 | 6 | 7 | 6 | 7 | 6 | | | | | 7 | 6 | | | | Item 9 | | | |
| 55 | 6 | 5 | 6 | 5 | 6 | 5 | 6 | 5 | | | | | 6 | 5 | | | | Item 10 | | | |
| 67 | 6 | 7 | 7 | 7 | 7 | 6 | 6 | 7 | | | | | 7 | 7 | | | | Item 11 | | | |
| 56 | 6 | 6 | 5 | 5 | 5 | 6 | 5 | 6 | | | | | 6 | 6 | | | | Item 12 | | | |
| 55 | 5 | 6 | 5 | 6 | 6 | 5 | 6 | 5 | | | | | 6 | 5 | | | | Item 13 | | | |
| 54 | 6 | 5 | 6 | 5 | 5 | 5 | 6 | 5 | | | | | 6 | 5 | | | | Item 14 | | | |
| 432 | 43 | 43 | 44 | 43 | 45 | 40 | 44 | 42 | | | | | 48 | 42 | | | | Total score | | | |
| 560 | | | | | | | | | | | | | | | | Maximum score | | | | |  | | | |
| 80 | | | | | | | | | | | | | | | | Minimum score | | | | |
| 73/33% | | | | | | | | | | | | | | | | Standard score | | | | |
| 60 | 6 | 6 | 6 | 6 | 6 | 6 | 6 | 6 | | | 6 | | | | 6 | | | | Item 15 | | | | | Clarity of Presentation | | | | | | |
| 64 | 6 | 6 | 7 | 6 | 7 | 6 | 7 | 6 | | | 7 | | | | 6 | | | | Item 16 | | | | |
| 56 | 5 | 6 | 6 | 5 | 6 | 6 | 6 | 5 | | | 5 | | | | 6 | | | | Item 17 | | | | |
| 180 | 17 | 18 | 19 | 17 | 19 | 18 | 19 | 17 | | | 18 | | | | 18 | | | | Total score | | | | |
| 210 | | | | | | | | | | | | | | | | Maximum score | | | | |  | | | |
| 30 | | | | | | | | | | | | | | | | Minimum score | | | | |
| 83/33% | | | | | | | | | | | | | | | | Standard score | | | | |
| 45 | 5 | 5 | 5 | 4 | 4 | 5 | 4 | 4 | | 4 | 5 | | | | | Item 18 | | | | | | | Applicability | | |
| 47 | 5 | 5 | 4 | 5 | 4 | 5 | 5 | 4 | | 5 | 5 | | | | | Item 19 | | | | | | |
| 54 | 5 | 6 | 5 | 6 | 5 | 5 | 6 | 5 | | 5 | 6 | | | | | Item 20 | | | | | | |
| 47 | 5 | 5 | 5 | 4 | 5 | 5 | 5 | 5 | | 4 | 4 | | | | | Item 21 | | | | | | |
| 193 | 20 | 21 | 19 | 19 | 18 | 20 | 20 | 18 | | 18 | 20 | | | | | Total score | | | | | | |
| 280 | | | | | | | | | | | | | | | | Maximum score | | | | |  | | | |
| 40 | | | | | | | | | | | | | | | | Minimum score | | | | |
| 63/75% | | | | | | | | | | | | | | | | Standard score | | | | |
| 53 | 5 | 5 | 6 | 5 | 5 | 5 | 5 | 6 | | | 5 | | | | 6 | | | | Item 22 | | | | | Editorial Independence | | | | | | |
| 65 | 6 | 7 | 6 | 7 | 6 | 7 | 7 | 6 | | | 7 | | | | 6 | | | | Item 23 | | | | |
| 118 | 11 | 12 | 12 | 12 | 11 | 12 | 12 | 12 | | | 12 | | | | 12 | | | | Total score | | | | |
| 140 | | | | | | | | | | | | | | | | Maximum score | | | | |  | | | |
| 20 | | | | | | | | | | | | | | | | Minimum score | | | | |
| 81/66% | | | | | | | | | | | | | | | | Standard score | | | | |
| 60 | 6 | 6 | 5 | 5 | 6 | 6 | 5 | | **6** | | 5 | | | | | 6 | | | | | Item 24 | | overall accessment | | |
|  | recommended with modifications | recommended | recommended | recommended | recommended | recommended | recommended | | recommended | | recommended | | | | | recommended | | | | | Item 25 | |
| 69 | | | | | | | | | | | | | | | | Standard score | | | | |  | | | |
| 70 | | | | | | | | | | | | | | | | Maximum score | | | | |
| 10 | | | | | | | | | | | | | | | | Minimum score | | | | |
| 76/66% | | | | | | | | | | | | | | | | Standard score | | | | |

1. **Management of multiple sclerosis**

| **Total score** | **Appraisers** | | | | | | | | | | | | | | domains | | | | | |
| --- | --- | --- | --- | --- | --- | --- | --- | --- | --- | --- | --- | --- | --- | --- | --- | --- | --- | --- | --- | --- |
| **10** | **9** | | **8** | | **7** | | **6** | | **5** | | **4** | **3** | **2** | **1** |  | | | | | | |
| 64 | 7 | 6 | | 6 | | 7 | | 6 | | 7 | | 6 | 7 | 6 | 6 | Item 1 | | | Scope and Purpose | | |
| 67 | 7 | 6 | | 7 | | 7 | | 6 | | 6 | | 7 | 7 | 7 | 7 | Item 2 | | |
| 70 | 7 | 7 | | 7 | | 7 | | 7 | | 7 | | 7 | 7 | 7 | 7 | Item 3 | | |
| 201 | 21 | 19 | | 20 | | 21 | | 19 | | 20 | | 20 | 21 | 20 | 20 | Total score | | |  | | |
| 210 | | | | | | | | | | | | | | | Maximum score | |  | | | |
| 30 | | | | | | | | | | | | | | | Minimum score | |
| 95% | | | | | | | | | | | | | | | Standard score | |
| 65 | 6 | 7 | 6 | | 7 | | 7 | | 6 | | 6 | | 7 | 6 | 7 | Item 4 | | | Stakeholder Involvement | | | | |
| 42 | 5 | 5 | 4 | | 5 | | 4 | | 5 | | 4 | | 5 | 5 | 5 | Item 5 | | |
| 66 | 7 | 6 | 7 | | 7 | | 6 | | 7 | | 7 | | 6 | 7 | 6 | Item 6 | | |
| 173 | 18 | 18 | 17 | | 19 | | 17 | | 18 | | 17 | | 18 | 18 | 18 | Total score | | |
| 210 | | | | | | | | | | | | | | | Maximum score | |  | | | |
| 30 | | | | | | | | | | | | | | | Minimum score | |
| 79/44% | | | | | | | | | | | | | | | Standard score | |
| 44 | 5 | 4 | 4 | | 4 | | 5 | | 5 | | 4 | | 4 | 4 | 5 | Item 7 | | Rigor of Development | | | | | | |
| 65 | 7 | 6 | 6 | | 7 | | 7 | | 6 | | 6 | | 7 | 7 | 6 | Item 8 | |
| 67 | 7 | 6 | 7 | | 7 | | 6 | | 7 | | 7 | | 6 | 7 | 7 | Item 9 | |
| 65 | 7 | 6 | 6 | | 7 | | 6 | | 7 | | 7 | | 6 | 7 | 6 | Item 10 | |
| 65 | 7 | 6 | 7 | | 6 | | 7 | | 7 | | 6 | | 6 | 7 | 6 | Item 11 | |
| 64 | 6 | 6 | 6 | | 7 | | 7 | | 6 | | 7 | | 6 | 7 | 6 | Item 12 | |
| 66 | 6 | 7 | 6 | | 7 | | 7 | | 6 | | 7 | | 6 | 7 | 7 | Item 13 | |
| 56 | 6 | 6 | 5 | | 5 | | 6 | | 6 | | 5 | | 5 | 6 | 6 | Item 14 | |
| 492 | 51 | 47 | 47 | | 51 | | 51 | | 50 | | 49 | | 46 | 52 | 49 | Total score | |
| 560 | | | | | | | | | | | | | | | Maximum score | |  | | | |
| 80 | | | | | | | | | | | | | | | Minimum score | |
| 85/83% | | | | | | | | | | | | | | | Standard score | |
| 65 | 6 | 6 | 7 | | 7 | | 6 | | 7 | | 6 | | 7 | 7 | 6 | Item 15 | | | | Clarity of Presentation | | | | | |
| 58 | 7 | 6 | 6 | | 7 | | 6 | | 6 | | 7 | | 6 | 6 | 7 | Item 16 | | | |
| 62 | 6 | 6 | 6 | | 7 | | 6 | | 6 | | 6 | | 6 | 7 | 6 | Item 17 | | | |
| 185 | 19 | 18 | 19 | | 21 | | 18 | | 19 | | 19 | | 19 | 20 | 19 | Total score | | | |
| 210 | | | | | | | | | | | | | | | Maximum score | |  | | | |
| 30 | | | | | | | | | | | | | | | Minimum score | |
| 86/11% | | | | | | | | | | | | | | | Standard score | |
| 53 | 5 | 6 | 5 | | 5 | | 5 | | 5 | | 5 | | 6 | 6 | 5 | Item 18 | | | | Applicability | | | | | |
| 53 | 6 | 6 | 5 | | 5 | | 5 | | 5 | | 5 | | 6 | 5 | 5 | Item 19 | | | |
| 54 | 5 | 5 | 5 | | 5 | | 6 | | 6 | | 5 | | 6 | 6 | 5 | Item 20 | | | |
| 44 | 4 | 5 | 4 | | 4 | | 4 | | 5 | | 5 | | 4 | 4 | 5 | Item 21 | | | |
| 204 | 20 | 22 | 19 | | 19 | | 20 | | 21 | | 20 | | 22 | 21 | 20 | Total score | | | |
| 280 | | | | | | | | | | | | | | | Maximum score | |  | | | |
| 40 | | | | | | | | | | | | | | | Minimum score | |
| 68/33% | | | | | | | | | | | | | | | Standard score | |
| 45 | 4 | 4 | 5 | | 4 | | 5 | | 5 | | 5 | | 4 | 4 | 5 | Item 22 | | | | Editorial Independence | | | | | |
| 53 | 5 | 6 | 5 | | 5 | | 5 | | 6 | | 5 | | 5 | 5 | 6 | Item 23 | | | |
| 98 | 9 | 10 | 10 | | 9 | | 10 | | 11 | | 10 | | 9 | 9 | 11 | Total score | | | |
| 140 | | | | | | | | | | | | | | | Maximum score | |  | | | |
| 20 | | | | | | | | | | | | | | | Minimum score | |
| 65% | | | | | | | | | | | | | | | Standard score | |
| 53 | 5 | 5 | 5 | | 5 | | 6 | | 5 | | 5 | | **5** | 6 | 6 | Item 24 | | | | overall accessment | | | | | |
|  | recommended | recommended with modifications | recommended with modifications | | recommended with modifications | | recommended | | recommended with modifications | | recommended with modifications | | recommended with modifications | recommended | recommended | Item 25 | | | |
| 64 | | | | | | | | | | | | | | | Total score | |  | | | |
| 70 | | | | | | | | | | | | | | | Maximum score | |
| 10 | | | | | | | | | | | | | | | Minimum score | |
| 71/66% | | | | | | | | | | | | | | | Standard score | |

1. **Guideline for the diagnosis and management of multiple sclerosis**

| **Total score** | | | **Appraisers** | | | | | | | | | | | | | | | domains | | | | | | | | |
| --- | --- | --- | --- | --- | --- | --- | --- | --- | --- | --- | --- | --- | --- | --- | --- | --- | --- | --- | --- | --- | --- | --- | --- | --- | --- | --- |
| **10** | **9** | **8** | | **7** | | **6** | **5** | | **4** | | **3** | **2** | **1** | | | |  | | | | | | | | | |
| 54 | | 5 | 5 | 5 | | 6 | | 6 | 5 | | 5 | | 6 | 6 | 5 | | | | Item 1 | | | Scope and Purpose | | | | | | |
| 37 | | 4 | 4 | 3 | | 3 | | 4 | 3 | | 4 | | 4 | 4 | 4 | | | | Item 2 | | |
| 60 | | 6 | 6 | 6 | | 6 | | 6 | 6 | | 6 | | 6 | 6 | 6 | | | | Item 3 | | |
| 151 | | 15 | 15 | 14 | | 15 | | 16 | 14 | | 15 | | 16 | 16 | 15 | | | | Total score | | |
| 210 | | | | | | | | | | | | | | | | | Maximum score | | | |  | | | | |
| 30 | | | | | | | | | | | | | | | | | Minimum score | | | |
| 22/67% | | | | | | | | | | | | | | | | | Standard score | | | |
| 42 | | 4 | 4 | 5 | | 4 | | 4 | 4 | | 4 | | 4 | 5 | 4 | | | | Item 4 | | | | | | Stakeholder Involvement | | | | |
| 38 | | 4 | 4 | 4 | | 4 | | 4 | 3 | | 4 | | 3 | 4 | 4 | | | | Item 5 | | | | | |
| 51 | | 6 | 6 | 5 | | 6 | | 5 | 6 | | 5 | | 6 | 6 | 5 | | | | Item 6 | | | | | |
| 131 | | 14 | 14 | 14 | | 14 | | 13 | 13 | | 13 | | 13 | 15 | 13 | | | | Total score | | | | | |
| 210 | | | | | | | | | | | | | | | | | Maximum score | | | |  | | | | |
| 30 | | | | | | | | | | | | | | | | | Minimum score | | | |
| 56/11% | | | | | | | | | | | | | | | | | Standard score | | | |
| 20 | | 2 | 2 | 2 | | 2 | | 2 | 2 | | 2 | | 2 | 2 | 2 | | | | Item 7 | | | | | | Rigor of Development | | | | |
| 35 | | 3 | 4 | 3 | | 4 | | 3 | 3 | | 4 | | 4 | 3 | 4 | | | | Item 8 | | | | | |
| 27 | | 3 | 3 | 3 | | 3 | | 3 | 2 | | 3 | | 2 | 2 | 3 | | | | Item 9 | | | | | |
| 35 | | 4 | 4 | 4 | | 3 | | 3 | 3 | | 4 | | 3 | 3 | 4 | | | | Item 10 | | | | | |
| 43 | | 4 | 4 | 5 | | 4 | | 5 | 4 | | 4 | | 5 | 4 | 4 | | | | Item 11 | | | | | |
| 35 | | 4 | 3 | 4 | | 4 | | 3 | 4 | | 3 | | 3 | 3 | 4 | | | | Item 12 | | | | | |
| 22 | | 3 | 2 | 2 | | 2 | | 2 | 2 | | 2 | | 2 | 2 | 3 | | | | Item 13 | | | | | |
| 22 | | 3 | 2 | 3 | | 2 | | 2 | 2 | | 2 | | 2 | 2 | 2 | | | | Item 14 | | | | | |
| 239 | | 26 | 24 | 26 | | 24 | | 23 | 22 | | 24 | | 23 | 21 | 25 | | | | Total score | | | | | |
| 560 | | | | | | | | | | | | | | | | | Maximum score | | | |  | | | | |
| 80 | | | | | | | | | | | | | | | | | Minimum score | | | |
| 33/12% | | | | | | | | | | | | | | | | | Standard score | | | |
| 43 | | 4 | 4 | 4 | | 4 | | 5 | 4 | | 5 | | 4 | 5 | 4 | | | Item 15 | | | | | Clarity of Presentation | | | | |
| 42 | | 4 | 4 | 4 | | 4 | | 4 | 5 | | 5 | | 4 | 5 | 4 | | | Item 16 | | | | |
| 36 | | 3 | 3 | 3 | | 4 | | 4 | 3 | | 4 | | 4 | 4 | 4 | | | Item 17 | | | | |
| 121 | | 11 | 11 | 11 | | 12 | | 14 | 10 | | 14 | | 14 | 16 | 12 | | | Total score | | | | |
| 210 | | | | | | | | | | | | | | | | | Maximum score | | | |  | | | | |
| 30 | | | | | | | | | | | | | | | | | Minimum score | | | |
| 50/55% | | | | | | | | | | | | | | | | | Standard score | | | |
| 22 | | 2 | 2 | 2 | | 2 | | 3 | 2 | | 2 | | 3 | 2 | 2 | | | Item 18 | | | | | Applicability | | | | |
| 35 | | 4 | 4 | 4 | | 3 | | 4 | 3 | | 3 | | 4 | 3 | 3 | | | Item 19 | | | | |
| 32 | | 3 | 4 | 3 | | 3 | | 4 | 3 | | 3 | | 4 | 3 | 3 | | | Item 20 | | | | |
| 24 | | 3 | 2 | 2 | | 2 | | 2 | 3 | | 3 | | 2 | 2 | 3 | | | Item 21 | | | | |
| 113 | | 14 | 16 | 16 | | 14 | | 15 | 15 | | 13 | | 15 | 15 | 13 | | | Total score | | | | |
| 280 | | | | | | | | | | | | | | | | | Maximum score | | | |  | | | | |
| 40 | | | | | | | | | | | | | | | | | Minimum score | | | |
| 30/41% | | | | | | | | | | | | | | | | | Standard score | | | |
| 34 | | 3 | 3 | 4 | | 4 | | 3 | 4 | | 3 | | 3 | 3 | 4 | | | Item 22 | | | | | Editorial Independence | | | | |
| 33 | | 3 | 4 | 3 | | 3 | | 4 | 3 | | 3 | | 4 | 3 | 3 | | | Item 23 | | | | |
| 67 | | 6 | 7 | 7 | | 7 | | 7 | 7 | | 6 | | 7 | 6 | 7 | | | Total score | | | | |
| 140 | | | | | | | | | | | | | | | | | Maximum score | | | |  | | | | |
| 20 | | | | | | | | | | | | | | | | | Minimum score | | | |
| 16/39% | | | | | | | | | | | | | | | | | Standard score | | | |
| 20 | 2 | | 2 | 2 | 2 | | 2 | | | 2 | | 2 | | 2 | | 2 | | | | 2 | | | | Item 24 | | | overall accessment | | |
|  | not recommended | | not recommended | not recommended | not recommended | | not recommended | | | not recommended | | not recommended | | not recommended | | not recommended | | | | not recommended | | | | Item 25 | | |
| 20 | | | | | | | | | | | | | | | | | Total score | | | |  | | | | |
| 70 | | | | | | | | | | | | | | | | | Maximum score | | | |
| 10 | | | | | | | | | | | | | | | | | Minimum score | | | |
| 66/16% | | | | | | | | | | | | | | | | | Standard score | | | |

**4. CMSC practical Guidelines for the selection of Disease-modifying Therapies in Multiple sclerosis**

| **Total score** | **Appraisers** | | | | | | | | | | | | | | | | | | domains | | | | | | | | |
| --- | --- | --- | --- | --- | --- | --- | --- | --- | --- | --- | --- | --- | --- | --- | --- | --- | --- | --- | --- | --- | --- | --- | --- | --- | --- | --- | --- |
| **10** | **9** | **8** | **7** | **6** | | **5** | | | **4** | | **3** | | **2** | | | **1** | |  | | | | | | | | | | |
| 53 | 5 | 6 | 5 | 5 | 5 | | 5 | | | 6 | | 6 | | 5 | | | 5 | | Item 1 | | | | Scope and Purpose | | | | | |
| 40 | 4 | 4 | 4 | 4 | 4 | | 4 | | | 4 | | 4 | | 4 | | | 4 | | Item 2 | | | |
| 51 | 5 | 6 | 5 | 5 | 5 | | 5 | | | 5 | | 5 | | 5 | | | 5 | | Item 3 | | | |
| 144 | 18 | 17 | 18 | 19 | 18 | | 18 | | | 17 | | 17 | | 18 | | | 20 | | **Total score** | | | |
| 210 | | | | | | | | | | | | | | | | | | | Maximum score | | |  | | | | | |
| 30 | | | | | | | | | | | | | | | | | | | Minimum score | | |
| 63/33% | | | | | | | | | | | | | | | | | | | Standard score | | |
| 33 | 4 | 3 | 4 | 3 | 3 | | 3 | | | 3 | | 4 | | | 3 | | 3 | | Item 4 | | | | | | Stakeholder Involvement | | | | | | | |
| 28 | 3 | 2 | 3 | 3 | 2 | | 3 | | | 3 | | 3 | | | 3 | | 3 | | Item 5 | | | | | |
| 62 | 6 | 6 | 6 | 7 | 6 | | 6 | | | 6 | | 6 | | | 7 | | 6 | | Item 6 | | | | | |
| 123 | 13 | 11 | 13 | 13 | 11 | | 12 | | | 12 | | 13 | | | 13 | | 12 | | **Total score** | | | | | |
| 210 | | | | | | | | | | | | | | | | | | | Maximum score | | |  | | | | | |
| 30 | | | | | | | | | | | | | | | | | | | Minimum score | | |
| 51/66% | | | | | | | | | | | | | | | | | | | Standard score | | |
| 20 | 2 | 2 | 2 | 2 | 2 | | 2 | | 2 | | | 2 | | | | 2 | | 2 | | | Item 7 | | | | | Rigor of Development | | | | | |
| 35 | 3 | 4 | 3 | 4 | 3 | | 4 | | 3 | | | 4 | | | | 4 | | 3 | | | Item 8 | | | | |
| 27 | 3 | 3 | 3 | 3 | 2 | | 3 | | 3 | | | 2 | | | | 2 | | 3 | | | Item 9 | | | | |
| 36 | 3 | 4 | 3 | 4 | 4 | | 3 | | 3 | | | 4 | | | | 4 | | 4 | | | Item 10 | | | | |
| 42 | 5 | 4 | 4 | 4 | 4 | | 4 | | 5 | | | 4 | | | | 4 | | 4 | | | Item 11 | | | | |
| 37 | 4 | 4 | 4 | 3 | 3 | | 4 | | 4 | | | 3 | | | | 4 | | 4 | | | Item 12 | | | | |
| 25 | 2 | 3 | 3 | 3 | 2 | | 3 | | 2 | | | 2 | | | | 2 | | 3 | | | Item 13 | | | | |
| 21 | 2 | 2 | 3 | 2 | 2 | | 2 | | 2 | | | 2 | | | | 2 | | 2 | | | Item 14 | | | | |
| 243 | 24 | 26 | 25 | 25 | 22 | | 25 | | 24 | | | 23 | | | | 24 | | 25 | | | **Total score** | | | | |
| 560 | | | | | | | | | | | | | | | | | | | Maximum score | | |  | | | | | |
| 80 | | | | | | | | | | | | | | | | | | | Minimum score | | |
| 33/95% | | | | | | | | | | | | | | | | | | | Standard score | | |
| 45 | 5 | 5 | 4 | 5 | 4 | | 4 | | 5 | | | 4 | 4 | | | | 5 | | Item 15 | | | | | | Clarity of Presentation | | | | | | | |
| 34 | 3 | 4 | 3 | 4 | 3 | | 3 | | 3 | | | 4 | 4 | | | | 3 | | Item 16 | | | | | |
| 36 | 3 | 4 | 3 | 4 | 4 | | 4 | | 4 | | | 3 | 3 | | | | 4 | | Item 17 | | | | | |
| 115 | 17 | 14 | 14 | 14 | 18 | | 16 | | 18 | | | 20 | 20 | | | | 14 | | **Total score** | | | | | |
| 210 | | | | | | | | | | | | | | | | | | | Maximum score | | |  | | | | | |
| 30 | | | | | | | | | | | | | | | | | | | Minimum score | | |
| 47/22% | | | | | | | | | | | | | | | | | | | Standard score | | |
| 27 | 3 | 3 | 3 | 2 | 2 | | 3 | | | 3 | | 2 | | 3 | | | 3 | | | Item 18 | | | | Applicability | | | | | | |
| 35 | 4 | 3 | 3 | 3 | 4 | | 4 | | | 3 | | 4 | | 3 | | | 4 | | | Item 19 | | | |
| 28 | 3 | 3 | 3 | 2 | 2 | | 3 | | | 3 | | 2 | | 3 | | | 4 | | | Item 20 | | | |
| 27 | 3 | 3 | 3 | 3 | 2 | | 3 | | | 3 | | 2 | | 3 | | | 2 | | | Item 21 | | | |
| 117 | 13 | 12 | 12 | 10 | 10 | | 13 | | | 12 | | 10 | | 12 | | | 13 | | | **Total score** | | | |
| 280 | | | | | | | | | | | | | | | | | | | Maximum score | | |  | | | | | |
| 40 | | | | | | | | | | | | | | | | | | | Minimum score | | |
| 32/08% | | | | | | | | | | | | | | | | | | | Standard score | | |
| 37 | 4 | 4 | 4 | 3 | 4 | 4 | | 4 | | | | 3 | 4 | | | | 3 | | Item 22 | | | | | | Editorial Independence | | | | | | | |
| 36 | 4 | 3 | 4 | 4 | 3 | 4 | | 4 | | | | 3 | 4 | | | | 3 | | Item 23 | | | | | |
| 73 | 8 | 7 | 8 | 7 | 7 | 8 | | 8 | | | | 6 | 8 | | | | 6 | | **Total score** | | | | | |
| 140 | | | | | | | | | | | | | | | | | | | Maximum score | | |  | | | | | |
| 20 | | | | | | | | | | | | | | | | | | | Minimum score | | |
| 44/16% | | | | | | | | | | | | | | | | | | | Standard score | | |
| 21 | 2 | 2 | 2 | 2 | 2 | 3 | | 2 | | | | 2 | 2 | | | | 2 | | Item 24 | | | | | | | | overall accessment | | | | | |
|  | not recommended | not recommended | not recommended | not recommended | not recommended | not recommended | | not recommended | | | not recommended | | not recommended | | | | not recommended | | Item 25 | | | | | | | |
| 52 | | | | | | | | | | | | | | | | | | | **Total score** | | |  | | | | | |
| 70 | | | | | | | | | | | | | | | | | | | Maximum score | | |
| 10 | | | | | | | | | | | | | | | | | | | Minimum score | | |
| 18/33% | | | | | | | | | | | | | | | | | | | Standard score | | |

1. **Practice guideline: Disease-modifying therapies for adults with multiple sclerosis**

| **Total score** | | **Appraisers** | | | | | | | | | | | | | | | | | | domains | | | | | | | | | | |
| --- | --- | --- | --- | --- | --- | --- | --- | --- | --- | --- | --- | --- | --- | --- | --- | --- | --- | --- | --- | --- | --- | --- | --- | --- | --- | --- | --- | --- | --- | --- |
| **10** | | **9** | | **8** | **7** | | **6** | | **5** | **4** | | **3** | | | **2** | | | **1** |  | | | | | | | | | | | |
| 63 | 6 | | 6 | | 6 | 7 | | 7 | | 6 | 6 | | 6 | | | 7 | | | 6 | Item 1 | | | | Scope and Purpose | | | | | | |
| 57 | 6 | | 6 | | 6 | 5 | | 6 | | 5 | 5 | | 6 | | | 6 | | | 6 | Item 2 | | | |
| 64 | 6 | | 6 | | 7 | 6 | | 7 | | 6 | 7 | | 6 | | | 7 | | | 6 | Item 3 | | | |
| 184 | 18 | | 18 | | 19 | 18 | | 20 | | 17 | 18 | | 18 | | | 20 | | | 18 | **Total score** | | | |
| 210 | | | | | | | | | | | | | | | | | | | Maximum score | | | |  | | | | | | |
| 30 | | | | | | | | | | | | | | | | | | | Minimum score | | | |
| %85/55 | | | | | | | | | | | | | | | | | | | Standard score | | | |
| 65 | 6 | | 7 | | 7 | 6 | | 7 | | 6 | 7 | | | 6 | | | 6 | | 7 | | Item 4 | | | | | | Stakeholder Involvement | | | | | |
| 38 | 3 | | 4 | | 4 | 4 | | 4 | | 3 | 4 | | | 4 | | | 4 | | 4 | | Item 5 | | | | | |
| 53 | 5 | | 5 | | 5 | 6 | | 6 | | 5 | 5 | | | 5 | | | 6 | | 5 | | Item 6 | | | | | |
| 156 | 14 | | 16 | | 16 | 16 | | 17 | | 14 | 16 | | | 15 | | | 16 | | 16 | | **Total score** | | | | | |
| 210 | | | | | | | | | | | | | | | | | | | Maximum score | | | |  | | | | | | |
| 30 | | | | | | | | | | | | | | | | | | | Minimum score | | | |
| 70% | | | | | | | | | | | | | | | | | | | Standard score | | | |
| 20 | 2 | | 2 | | 2 | 2 | | 2 | | 2 | 2 | | | 2 | | | 2 | | 2 | | Item 7 | | | | | | | Rigor of Development | | | | |
| 65 | 6 | | 7 | | 6 | 6 | | 7 | | 6 | 7 | | | 7 | | | 7 | | 6 | | Item8 | | | | | | |
| 47 | 5 | | 5 | | 4 | 5 | | 4 | | 5 | 5 | | | 4 | | | 5 | | 5 | | Item 9 | | | | | | |
| 52 | 5 | | 5 | | 5 | 5 | | 5 | | 6 | 6 | | | 5 | | | 5 | | 5 | | Item 10 | | | | | | |
| 47 | 5 | | 4 | | 5 | 5 | | 4 | | 5 | 4 | | | 5 | | | 5 | | 5 | | Item 11 | | | | | | |
| 54 | 5 | | 6 | | 5 | 6 | | 6 | | 5 | 6 | | | 5 | | | 5 | | 5 | | Item 12 | | | | | | |
| 43 | 4 | | 4 | | 5 | 4 | | 4 | | 4 | 5 | | | 4 | | | 5 | | 4 | | Item 13 | | | | | | |
| 37 | 4 | | 4 | | 4 | 5 | | 4 | | 4 | 4 | | | 4 | | | 4 | | 4 | | Item14 | | | | | | |
| 365 | 36 | | 38 | | 36 | 38 | | 36 | | 37 | 39 | | | 35 | | | 33 | | 36 | | **Total score** | | | | | | |
| 560 | | | | | | | | | | | | | | | | | | | Maximum score | | | |  | | | | | | |
| 80 | | | | | | | | | | | | | | | | | | | Minimum score | | | |
| 59/37% | | | | | | | | | | | | | | | | | | | Standard score | | | |
| 58 | 6 | | 6 | | 6 | 6 | | 5 | | 6 | 5 | | 6 | | | 6 | | | 6 | Item 15 | | | | | | Clarity of Presentation | | | | | | | | |
| 30 | 3 | | 3 | | 3 | 3 | | 3 | | 3 | 3 | | 3 | | | 3 | | | 3 | Item 16 | | | | | |
| 31 | 3 | | 3 | | 3 | 4 | | 3 | | 3 | 3 | | 3 | | | 3 | | | 3 | Item 17 | | | | | |
| 119 | 12 | | 12 | | 12 | 13 | | 11 | | 12 | 11 | | 12 | | | 12 | | | 12 | **Total score** | | | | | |
| 210 | | | | | | | | | | | | | | | | | | | Maximum score | | | |  | | | | | | |
| 30 | | | | | | | | | | | | | | | | | | | Minimum score | | | |
| 49/44% | | | | | | | | | | | | | | | | | | | Standard score | | | |
| 31 | 3 | | 3 | | 3 | 3 | | 3 | | 3 | 4 | | 3 | | | 3 | | | 3 | Item 18 | | | | | | Applicability | | | | | | | | |
| 34 | 4 | | 4 | | 3 | 4 | | 3 | | 3 | 3 | | 3 | | | 4 | | | 3 | Item 19 | | | | | |
| 34 | 4 | | 4 | | 4 | 3 | | 3 | | 3 | 3 | | 4 | | | 3 | | | 3 | Item 20 | | | | | |
| 25 | 2 | | 2 | | 3 | 2 | | 3 | | 3 | 2 | | 3 | | | 3 | | | 2 | Item 21 | | | | | |
| 124 | 13 | | 13 | | 13 | 12 | | 12 | | 12 | 12 | | 13 | | | 13 | | | 11 | **Total score** | | | | | |
| 280 | | | | | | | | | | | | | | | | | | | Maximum score | | | |  | | | | | | |
| 40 | | | | | | | | | | | | | | | | | | | Minimum score | | | |
| 35% | | | | | | | | | | | | | | | | | | | Standard score | | | |
| 37 | 4 | | 4 | | 3 | 4 | | 4 | | 3 | 4 | | 4 | | | 3 | | | 4 | Item 22 | | | | | | Editorial Independence | | | | | | | | |
| 48 | 5 | | 5 | | 4 | 5 | | 5 | | 5 | 5 | | 4 | | | 5 | | | 5 | Item 23 | | | | | |
| 85 | 9 | | 9 | | 7 | 9 | | 9 | | 8 | 9 | | 8 | | | 8 | | | 9 | **Total score** | | | | | |
| 140 | | | | | | | | | | | | | | | | | | | Maximum score | | | |  | | | | | | |
| 20 | | | | | | | | | | | | | | | | | | | Minimum score | | | |
| 54/16% | | | | | | | | | | | | | | | | | | | Standard score | | | |
| 27 | 3 | 2 | | 3 | | | 3 | | 2 | | | 3 | | | 3 | | | **3** | | | | 2 | | | 3 | | | | Item 24 | | | | | overall accessment |
|  | not recommended | not recommended | | not recommended | | | not recommended | | not recommended | | | not recommended | | | not recommended | | | not recommended | | | | not recommended | | | not recommended | | | | Item 25 | | | | |
| 20 | | | | | | | | | | | | | | | | | | | **Total score** | | | |  | | | | | | |
| 70 | | | | | | | | | | | | | | | | | | | Maximum score | | | |
| 10 | | | | | | | | | | | | | | | | | | | Minimum score | | | |
| 28/33% | | | | | | | | | | | | | | | | | | | Standard score | | | |

**6. Multiple sclerosis: Best practices in Nursisng Care Disease Management, Comperhensive Care, pharmacologic Management, Nursing Research**

| **Total score** | | **Appraisers** | | | | | | | | | | | | domains | | | | | | |
| --- | --- | --- | --- | --- | --- | --- | --- | --- | --- | --- | --- | --- | --- | --- | --- | --- | --- | --- | --- | --- |
| **10** | | **9** | **8** | **7** | **6** | **5** | | **4** | **3** | **2** | | **1** | | | | |  | | |
| 56 | | 6 | | 6 | 6 | 7 | 6 | 6 | | 6 | 6 | 7 | | 7 | | | | | Item 1 | | | Scope and Purpose | | | | |
| 40 | | 5 | | 4 | 5 | 5 | 4 | 4 | | 4 | 4 | 5 | | 7 | | | | | Item 2 | | |
| 49 | | 6 | | 6 | 5 | 5 | 6 | 5 | | 6 | 5 | 5 | | 7 | | | | | Item 3 | | |
| 145 | | 17 | | 16 | 16 | 17 | 16 | 15 | | 16 | 15 | 17 | | 21 | | | | | **Total score** | | |
| 210 | | | | | | | | | | | | | | Maximum score | | |  | | | |
| 30 | | | | | | | | | | | | | | Minimum score | | |
| 63/88% | | | | | | | | | | | | | | Standard score | | |
| 56 | | 6 | | 6 | 5 | 6 | 6 | 5 | | 6 | 6 | 5 | | 5 | | Item 4 | | | | Stakeholder Involvement | | |
| 34 | | 4 | | 3 | 4 | 3 | 4 | 3 | | 4 | 3 | 3 | | 3 | | Item 5 | | | |
| 63 | | 6 | | 7 | 6 | 6 | 6 | 7 | | 6 | 6 | 7 | | 6 | | Item 6 | | | |
| 153 | | 16 | | 15 | 15 | 15 | 16 | 14 | | 16 | 15 | 14 | | 14 | | **Total score** | | | |
| 210 | | | | | | | | | | | | | | Maximum score | | |  | | | |
| 30 | | | | | | | | | | | | | | Minimum score | | |
| 68/33% | | | | | | | | | | | | | | Standard score | | |
| 18 | | 2 | | 2 | 2 | 2 | 2 | 2 | | 2 | 2 | 2 | | 1 | | | | Item 7 | | | | Rigor of Development | | | |
| 44 | | 5 | | 5 | 5 | 5 | 5 | 5 | | 4 | 5 | 5 | | 6 | | | | Item 8 | | | |
| 34 | | 4 | | 3 | 4 | 4 | 4 | 4 | | 4 | 3 | 4 | | 6 | | | | Item 9 | | | |
| 41 | | 5 | | 4 | 4 | 5 | 4 | 4 | | 4 | 5 | 4 | | 6 | | | | Item 10 | | | |
| 59 | | 7 | | 6 | 7 | 6 | 6 | 7 | | 6 | 7 | 7 | | 7 | | | | Item 11 | | | |
| 52 | | 6 | | 6 | 6 | 6 | 6 | 5 | | 6 | 5 | 6 | | 6 | | | | Item 12 | | | |
| 43 | | 5 | | 5 | 5 | 4 | 5 | 5 | | 4 | 5 | 5 | | 1 | | | | Item 13 | | | |
| 27 | | 3 | | 3 | 3 | 3 | 3 | 3 | | 3 | 3 | 3 | | 5 | | | | Item 14 | | | |
| 318 | | 34 | | 35 | 34 | 38 | 37 | 34 | | 40 | 35 | 39 | | 38 | | | | **Total score** | | | |
| 560 | | | | | | | | | | | | | | Maximum score | | |  | | | |
| 80 | | | | | | | | | | | | | | Minimum score | | |
| 49/58% | | | | | | | | | | | | | | Standard score | | |
| 50 | | 6 | | 5 | 5 | 6 | 6 | 6 | | 5 | 6 | 5 | | 6 | | | | | Item 15 | | | | | | Clarity of Presentation | | | |
| 62 | | 6 | | 6 | 5 | 6 | 7 | 6 | | 6 | 7 | 7 | | 6 | | | | | Item 16 | | | | | |
| 50 | | 6 | | 6 | 5 | 6 | 5 | 5 | | 6 | 6 | 5 | | 6 | | | | | Item 17 | | | | | |
| 162 | | 18 | | 18 | 16 | 18 | 21 | 17 | | 19 | 20 | 21 | | 18 | | | | | **Total score** | | | | | |
| 210 | | | | | | | | | | | | | | Maximum score | | |  | | | |
| 30 | | | | | | | | | | | | | | Minimum score | | |
| 73/33% | | | | | | | | | | | | | | Standard score | | |
| 38 | | 4 | | 4 | 4 | 4 | 4 | 5 | | 4 | 4 | 5 | | 4 | | | | | Item 18 | | | | | | Applicability | | | |
| 40 | | 5 | | 4 | 4 | 5 | 4 | 5 | | 4 | 4 | 5 | | 4 | | | | | Item 19 | | | | | |
| 39 | | 5 | | 4 | 4 | 5 | 4 | 4 | | 5 | 4 | 4 | | 4 | | | | | Item 20 | | | | | |
| 40 | | 5 | | 4 | 4 | 4 | 4 | 4 | | 5 | 4 | 5 | | 6 | | | | | Item 21 | | | | | |
| 157 | | 19 | | 16 | 16 | 18 | 16 | 16 | | 16 | 16 | 19 | | 18 | | | | | **Total score** | | | | | |
| 280 | | | | | | | | | | | | | | Maximum score | | |  | | | |
| 40 | | | | | | | | | | | | | | Minimum score | | |
| 48/75% | | | | | | | | | | | | | | Standard score | | |
| 33 | | 4 | | 4 | 3 | 4 | 3 | | 4 | 4 | 3 | 4 | | 6 | | | | | Item 22 | | | | | | Editorial Independence | | | |
| 60 | | 6 | | 6 | 5 | 7 | 6 | | 5 | 7 | 7 | 7 | | 4 | | | | | Item 23 | | | | | |
| 93 | | 10 | | 10 | 8 | 11 | 8 | | 9 | 11 | 10 | 11 | | 10 | | | | | **Total score** | | | | | |
| 140 | | | | | | | | | | | | | | Maximum score | | |  | | | |
| 20 | | | | | | | | | | | | | | Minimum score | | |
| 60/83% | | | | | | | | | | | | | | Standard score | | |
| 50 | 5 | | 5 | | 5 | 5 | 5 | | 5 | 5 | 5 | **5** | | 5 | | | | | Item 24 | | | | | | overall accessment | | | |
|  | recommended | | recommended with modifications | | recommended | recommended | recommended with modifications | | recommended | recommended | recommended | | recommended | | recommended with modifications | | | | | Item 25 | | | |  | | | |
| 52 | | | | | | | | | | | | | | **Total score** | | |  | | | |
| 70 | | | | | | | | | | | | | | Maximum score | | |
| 10 | | | | | | | | | | | | | | Minimum score | | |
| 66/66% | | | | | | | | | | | | | | Standard score | | |

**7.** Clinical Practice Guideline Series: Nursing Management of the Patient with Multiple Sclerosis

| **Total score** | | **Appraisers** | | | | | | | | | | | | | | | | | | | | domains | | | | | | | | | | |
| --- | --- | --- | --- | --- | --- | --- | --- | --- | --- | --- | --- | --- | --- | --- | --- | --- | --- | --- | --- | --- | --- | --- | --- | --- | --- | --- | --- | --- | --- | --- | --- | --- |
| **10** | | | **9** | | | **8** | | **7** | | **6** | | **5** | | | **4** | | **3** | **2** | **1** | | |  | | | | | | | | | | |
| 50 | | 6 | | | 6 | | | 5 | | 5 | | 6 | | 5 | | | 5 | | 6 | 5 | 6 | | | Item 1 | | | | Scope and Purpose | | | | | |
| 53 | | 2 | | | 2 | | | 2 | | 3 | | 3 | | 2 | | | 3 | | 3 | 4 | 3 | | | Item 2 | | | |
| 55 | | 5 | | | 6 | | | 6 | | 5 | | 5 | | 6 | | | 6 | | 5 | 6 | 5 | | | Item 3 | | | |
| 158 | | 13 | | | 14 | | | 13 | | 13 | | 14 | | 13 | | | 14 | | 14 | 15 | 14 | | | **Total score** | | | |
| 210 | | | | | | | | | | | | | | | | | | | | | | Maximum score | | | | |  | | | | | |
| 30 | | | | | | | | | | | | | | | | | | | | | | Minimum score | | | | |
| 71/11% | | | | | | | | | | | | | | | | | | | | | | Standard score | | | | |
| 56 | 5 | | | 5 | | | | 6 | | 6 | | 6 | | 6 | | | 5 | | 6 | 6 | 5 | | Item 4 | | | | | | | Stakeholder Involvement | | | | | | |
| 36 | 3 | | | 4 | | | | 3 | | 4 | | 4 | | 3 | | | 4 | | 3 | 4 | 4 | | Item 5 | | | | | | |
| 64 | 6 | | | 6 | | | | 7 | | 6 | | 7 | | 7 | | | 6 | | 7 | 6 | 6 | | Item 6 | | | | | | |
| 156 | 14 | | | 14 | | | | 16 | | 16 | | 17 | | 16 | | | 15 | | 16 | 16 | 15 | | **Total score** | | | | | | |
| 210 | | | | | | | | | | | | | | | | | | | | | | Maximum score | | | | |  | | | | | |
| 30 | | | | | | | | | | | | | | | | | | | | | | Minimum score | | | | |
| 70% | | | | | | | | | | | | | | | | | | | | | | Standard score | | | | |
| 10 | 1 | | 1 | | | 1 | | 1 | | | 1 | | | 1 | | | 1 | | 1 | 1 | 1 | | | Item 7 | | | | | | | Rigor of Development | | | | | | |
| 61 | 6 | | 6 | | | 5 | | 6 | | | 6 | | | 6 | | | 6 | | 7 | 7 | 6 | | | Item 8 | | | | | | |
| 44 | 4 | | 5 | | | 4 | | 4 | | | 4 | | | 5 | | | 5 | | 4 | 5 | 4 | | | Item 9 | | | | | | |
| 44 | 4 | | 4 | | | 5 | | 5 | | | 5 | | | 4 | | | 4 | | 4 | 4 | 5 | | | Item 10 | | | | | | |
| 44 | 4 | | 4 | | | 5 | | 5 | | | 4 | | | 4 | | | 4 | | 5 | 4 | 5 | | | Item 11 | | | | | | |
| 45 | 5 | | 4 | | | 5 | | 4 | | | 4 | | | 5 | | | 4 | | 4 | 5 | 5 | | | Item 12 | | | | | | |
| 43 | 4 | | 4 | | | 4 | | 4 | | | 4 | | | 5 | | | 5 | | 5 | 4 | 4 | | | Item 13 | | | | | | |
| 20 | 2 | | 2 | | | 2 | | 2 | | | 2 | | | 2 | | | 2 | | 2 | 2 | 2 | | | Item 14 | | | | | | |
| 311 | 30 | | 30 | | | 31 | | 31 | | | 30 | | | 32 | | | 31 | | 32 | 32 | 32 | | | **Total score** | | | | | | |
| 560 | | | | | | | | | | | | | | | | | | | | | | Maximum score | | | | |  | | | | | |
| 80 | | | | | | | | | | | | | | | | | | | | | | Minimum score | | | | |
| 48/12% | | | | | | | | | | | | | | | | | | | | | | Standard score | | | | |
| 56 | 6 | | 6 | | | 5 | | 5 | | | 6 | | | 6 | | | 5 | | 6 | 5 | 6 | | | | Item 15 | | | | Clarity of Presentation | | | | | | | | | |
| 46 | 5 | | 5 | | | 4 | | 5 | | | 4 | | | 5 | | | 5 | | 4 | 5 | 4 | | | | Item 16 | | | |
| 45 | 4 | | 5 | | | 4 | | 5 | | | 5 | | | 4 | | | 4 | | 5 | 4 | 5 | | | | Item 17 | | | |
| 147 | 15 | | 16 | | | 13 | | 15 | | | 14 | | | 14 | | | 14 | | 15 | 14 | 15 | | | | **Total score** | | | |
| 210 | | | | | | | | | | | | | | | | | | | | | | Maximum score | | | | |  | | | | | |
| 30 | | | | | | | | | | | | | | | | | | | | | | Minimum score | | | | |
| 65% | | | | | | | | | | | | | | | | | | | | | | Standard score | | | | |
| 33 | 4 | | 3 | | | 3 | | 4 | | | 3 | | | 3 | | | 4 | | 3 | 3 | 3 | | | | Item 18 | | | | Applicability | | | | | | | | | |
| 34 | 3 | | 4 | | | 4 | | 4 | | | 3 | | | 3 | | | 3 | | 3 | 3 | 4 | | | | Item 19 | | | |
| 34 | 3 | | 3 | | | 4 | | 3 | | | 3 | | | 4 | | | 4 | | 3 | 4 | 3 | | | | Item 20 | | | |
| 18 | 2 | | 2 | | | 1 | | 2 | | | 1 | | | 2 | | | 2 | | 2 | 2 | 2 | | | | Item 221 | | | |
| 119 | 12 | | 12 | | | 12 | | 13 | | | 10 | | | 12 | | | 13 | | 11 | 12 | 12 | | | | **Total score** | | | |
| 280 | | | | | | | | | | | | | | | | | | | | | | Maximum score | | | | |  | | | | | |
| 40 | | | | | | | | | | | | | | | | | | | | | | Minimum score | | | | |
| 32/91% | | | | | | | | | | | | | | | | | | | | | | Standard score | | | | |
| 24 | 2 | | 3 | | | 2 | | 2 | | | 3 | | | 2 | | 2 | | | 3 | 2 | 3 | | | | Item 22 | | | | Editorial Independence | | | | | | | | | |
| 14 | 1 | | 1 | | | 1 | | 2 | | | 1 | | | 2 | | 2 | | | 1 | 2 | 1 | | | | Item 23 | | | |
| 38 | 3 | | 2 | | | 3 | | 4 | | | 2 | | | 4 | | 3 | | | 2 | 4 | 2 | | | | **Total score** | | | |
| 140 | | | | | | | | | | | | | | | | | | | | | | Maximum score | | | | |  | | | | | |
| 20 | | | | | | | | | | | | | | | | | | | | | | Minimum score | | | | |
| 15% | | | | | | | | | | | | | | | | | | | | | | Standard score | | | | |
| 44 | 4 | | 4 | | | | 5 | | 5 | | | | 5 | | 4 | | | 4 | | **4** | | 5 | | | | 4 | | | | | | Item 24 | | | | overall accessment | | |
|  | recommended with modifications | | recommended with modifications | | | | recommended with modifications | | recommended with modifications | | | | recommended with modifications | | recommended with modifications | | | recommended with modifications | | recommended with modifications | | recommended with modifications | | | | recommended with modifications | | | | | | Item 25 | | | |
| 32 | | | | | | | | | | | | | | | | | | | | | | **Total score** | | | | |  | | | | | |
| 70 | | | | | | | | | | | | | | | | | | | | | | Maximum score | | | | |
| 10 | | | | | | | | | | | | | | | | | | | | | | Minimum score | | | | |
| 56/66% | | | | | | | | | | | | | | | | | | | | | | Standard score | | | | |

**8. A Practical Guide to Rehabilitation in Multiple sclerosis**

| **Total score** | | **ارزیابان** | | | | | | | | | | | | | | | | | | | | domains | | | | | | | | | | |
| --- | --- | --- | --- | --- | --- | --- | --- | --- | --- | --- | --- | --- | --- | --- | --- | --- | --- | --- | --- | --- | --- | --- | --- | --- | --- | --- | --- | --- | --- | --- | --- | --- |
| **10** | | | **9** | | | **8** | | **7** | | **6** | | **5** | | | **4** | | **3** | **2** | **1** | | |  | | | | | | | | | | |
| 64 | | 6 | | | 6 | | | 6 | | 7 | | 6 | | 7 | | | 7 | | 6 | 7 | 6 | | | Item 1 | | | | Scope and Purpose | | | | | |
| 16 | | 2 | | | 2 | | | 2 | | 1 | | 1 | | 2 | | | 2 | | 1 | 2 | 1 | | | Item 2 | | | |
| 65 | | 7 | | | 6 | | | 7 | | 6 | | 7 | | 7 | | | 6 | | 6 | 7 | 6 | | | Item 3 | | | |
| 145 | | 15 | | | 14 | | | 14 | | 14 | | 14 | | 16 | | | 15 | | 13 | 16 | 13 | | | **Total score** | | | |
| 210 | | | | | | | | | | | | | | | | | | | | | | Maximum score | | | | |  | | | | | |
| 30 | | | | | | | | | | | | | | | | | | | | | | Minimum score | | | | |
| 63/88% | | | | | | | | | | | | | | | | | | | | | | Standard score | | | | |
| 53 | 5 | | | 5 | | | | 5 | | 6 | | 5 | | 6 | | | 5 | | 5 | 6 | 5 | | Item 4 | | | | | | | Stakeholder Involvement | | | | | | |
| 38 | 4 | | | 4 | | | | 3 | | 4 | | 4 | | 3 | | | 4 | | 4 | 4 | 4 | | Item 5 | | | | | | |
| 70 | 7 | | | 7 | | | | 7 | | 7 | | 7 | | 7 | | | 7 | | 7 | 7 | 7 | | Item 6 | | | | | | |
| 161 | 16 | | | 16 | | | | 15 | | 17 | | 16 | | 16 | | | 16 | | 16 | 17 | 16 | | **Total score** | | | | | | |
| 210 | | | | | | | | | | | | | | | | | | | | | | Maximum score | | | | |  | | | | | |
| 30 | | | | | | | | | | | | | | | | | | | | | | Minimum score | | | | |
| 72/77% | | | | | | | | | | | | | | | | | | | | | | Standard score | | | | |
| 10 | 1 | | 1 | | | 1 | | 1 | | | 1 | | | 1 | | | 1 | | 1 | 1 | 1 | | | Item 7 | | | | | | | Rigor of Development | | | | | | |
| 26 | 3 | | 3 | | | 2 | | 2 | | | 3 | | | 3 | | | 2 | | 3 | 2 | 3 | | | Item 8 | | | | | | |
| 10 | 1 | | 1 | | | 1 | | 1 | | | 1 | | | 1 | | | 1 | | 1 | 1 | 1 | | | Item 9 | | | | | | |
| 24 | 2 | | 2 | | | 3 | | 3 | | | 3 | | | 2 | | | 2 | | 2 | 2 | 3 | | | Item 10 | | | | | | |
| 26 | 3 | | 2 | | | 3 | | 3 | | | 2 | | | 3 | | | 3 | | 2 | 2 | 3 | | | Item 11 | | | | | | |
| 27 | 3 | | 2 | | | 3 | | 3 | | | 2 | | | 3 | | | 3 | | 3 | 3 | 2 | | | Item 12 | | | | | | |
| 24 | 2 | | 2 | | | 3 | | 2 | | | 3 | | | 2 | | | 3 | | 2 | 3 | 2 | | | Item 13 | | | | | | |
| 26 | 2 | | 3 | | | 3 | | 3 | | | 2 | | | 2 | | | 3 | | 3 | 2 | 3 | | | Item 14 | | | | | | |
| 173 | 17 | | 16 | | | 19 | | 18 | | | 17 | | | 17 | | | 18 | | 17 | 16 | 18 | | | **Total score** | | | | | | |
| 560 | | | | | | | | | | | | | | | | | | | | | | Maximum score | | | | |  | | | | | |
| 80 | | | | | | | | | | | | | | | | | | | | | | Minimum score | | | | |
| 19.37 | | | | | | | | | | | | | | | | | | | | | | Standard score | | | | |
| 56 | 6 | | 6 | | | 5 | | 5 | | | 6 | | | 6 | | | 5 | | 6 | 5 | 6 | | | | Item 15 | | | | Clarity of Presentation | | | | | | | | | |
| 44 | 4 | | 5 | | | 4 | | 5 | | | 4 | | | 5 | | | 4 | | 4 | 5 | 4 | | | | Item 16 | | | |
| 40 | 4 | | 4 | | | 4 | | 4 | | | 4 | | | 4 | | | 4 | | 4 | 4 | 4 | | | | Item 17 | | | |
| 140 | 14 | | 15 | | | 13 | | 14 | | | 14 | | | 15 | | | 13 | | 14 | 14 | 14 | | | | **Total score** | | | |
| 210 | | | | | | | | | | | | | | | | | | | | | | Maximum score | | | | |  | | | | | |
| 30 | | | | | | | | | | | | | | | | | | | | | | Minimum score | | | | |
| 61/11% | | | | | | | | | | | | | | | | | | | | | | Standard score | | | | |
| 20 | 2 | | 2 | | | 2 | | 2 | | | 2 | | | 2 | | | 2 | | 2 | 2 | 2 | | | | Item 18 | | | | Applicability | | | | | | | | | |
| 34 | 4 | | 3 | | | 4 | | 3 | | | 4 | | | 3 | | | 4 | | 3 | 3 | 3 | | | | Item 19 | | | |
| 10 | 1 | | 1 | | | 1 | | 1 | | | 1 | | | 1 | | | 1 | | 1 | 1 | 1 | | | | Item 20 | | | |
| 10 | 1 | | 1 | | | 1 | | 1 | | | 1 | | | 1 | | | 1 | | 1 | 1 | 1 | | | | Item 21 | | | |
| 74 | 8 | | 7 | | | 8 | | 7 | | | 8 | | | 7 | | | 8 | | 7 | 7 | 7 | | | | **Total score** | | | |
| 280 | | | | | | | | | | | | | | | | | | | | | | Maximum score | | | | |  | | | | | |
| 40 | | | | | | | | | | | | | | | | | | | | | | Minimum score | | | | |
| 14/16% | | | | | | | | | | | | | | | | | | | | | | Standard score | | | | |
| 56 | 6 | | 5 | | | 6 | | 6 | | | 5 | | | 6 | | 6 | | | 5 | 6 | 5 | | | | Item 22 | | | | Editorial Independence | | | | | | | | | |
| 23 | 2 | | 2 | | | 3 | | 2 | | | 2 | | | 2 | | 3 | | | 3 | 2 | 2 | | | | Item 23 | | | |
| 79 | 8 | | 7 | | | 9 | | 8 | | | 7 | | | 8 | | 9 | | | 8 | 8 | 7 | | | | **Total score** | | | |
| 140 | | | | | | | | | | | | | | | | | | | | | | Maximum score | | | | |  | | | | | |
| 20 | | | | | | | | | | | | | | | | | | | | | | Minimum score | | | | |
| 49/16 | | | | | | | | | | | | | | | | | | | | | | Standard score | | | | |
| 38 | 4 | | 3 | | | | 4 | | 3 | | | | 5 | | 4 | | | 3 | | **4** | | 5 | | | | 3 | | | | | | Item 24 | | | | overall accessment | | |
|  | recommended with modifications | | recommended with modifications | | | | recommended with modifications | | not recommended | | | | recommended with modifications | | recommended with modifications | | | not recommended | | recommended with modifications | | recommended with modifications | | | | not recommended | | | | | | Item 25 | | | |
| 32 | | | | | | | | | | | | | | | | | | | | | | **Total score** | | | | |  | | | | | |
| 70 | | | | | | | | | | | | | | | | | | | | | | Maximum score | | | | |
| 10 | | | | | | | | | | | | | | | | | | | | | | Minimum score | | | | |
| 46/66% | | | | | | | | | | | | | | | | | | | | | | Standard score | | | | |
